# Supplementary material for: The Skeletal L-type Ca2+ Current Is a Major Contributor to Excitation-coupled Ca2+ entry
Source: PubMed Central journal article supplement — J Gen Physiol. 2009 Jan;133(1):79–91. doi: 10.1085/jgp.200810105 (PMC2606935; doi:10.1085/jgp.200810105), 2009-01
Supplement: jgp.200810105_1.pdf [file jgp.200810105_1.pdf]

Bannister et al., <http://www.jgp.org/cgi/content/full/jgp.200810105/DC1>

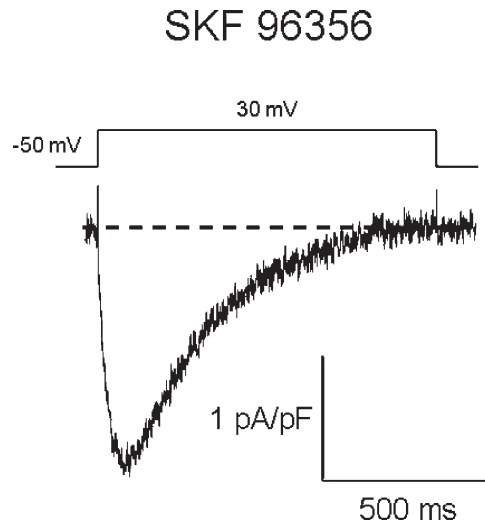

**Figure S1.** 1-s test potentials reveal near complete block of L-type current by 20  $\mu\text{M}$  SKF 96356. L-type  $\text{Ca}^{2+}$  current was elicited by a 1-s depolarization from  $-50$  to  $30$  mV after a prepulse protocol (see Materials and methods). The peak current amplitude (elicited by a 200-ms test pulse) before SKF 96356 application was  $10.4$  pA/pF.

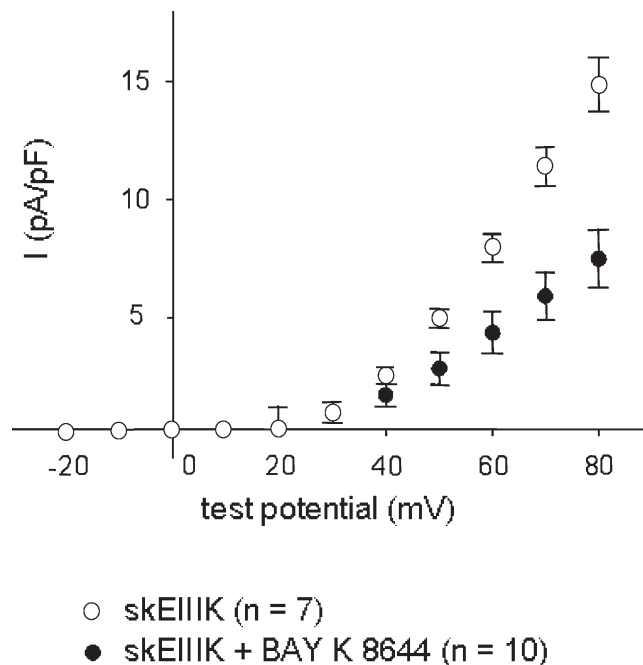

**Figure S2.** I-V relationships for dysgenic myotubes expressing SkE111K in the presence and absence of  $5$   $\mu\text{M}$   $\pm$ Bay K 8644. Currents were elicited at  $0.1$  Hz by test potentials ranging from  $-20$  through  $+80$  mV in  $10$ -mV increments after a prepulse protocol (see Materials and methods). The reduced outward current in the presence of  $\pm$ Bay K 8644 reflects entry of L-type channels into the long-duration open state (Leuranguer, V., R.T. Dirksen, and K.G. Beam. 2003. *J. Gen. Physiol.* 121:541–550).

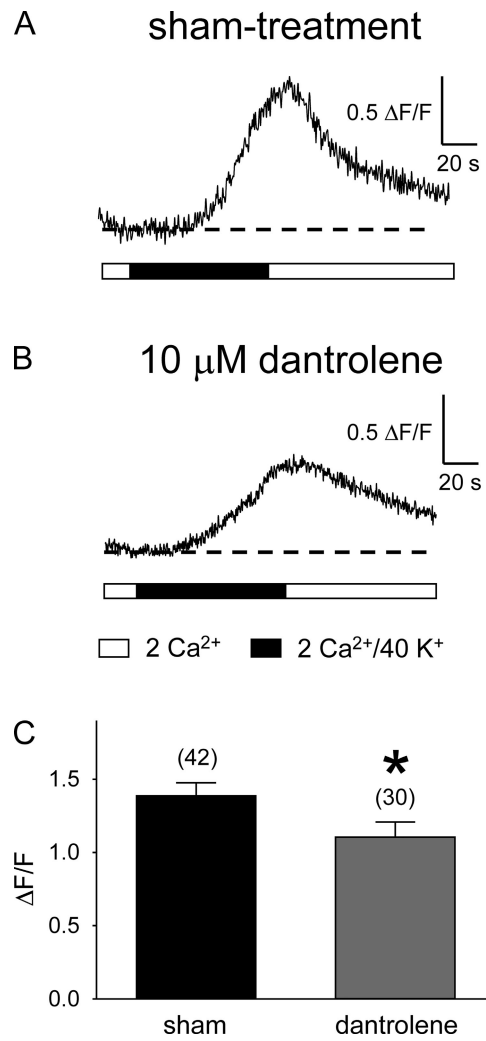

**Figure S3.** Dantrolene partially inhibits  $\text{Ca}^{2+}$  entry during long depolarizations. Representative  $\text{Ca}^{2+}$  transients evoked by bath perfusion of 40 mM KCl Ringer's solution for sham-incubated (20 min;  $\sim 25^\circ\text{C}$ ) normal myotubes (A) and normal myotubes exposed to 10  $\mu\text{M}$  dantrolene for the same duration (B). In each case, myotubes were exposed to 200  $\mu\text{M}$  ryanodine for >1 h at  $37^\circ\text{C}$  before experiments to block the contribution of RyR1 to the  $\text{Ca}^{2+}$  transient. (C) Summary. The asterisk indicates a significant difference in  $\Delta F/F$  ( $P < 0.05$ ;  $t$  test).
